# Supplementary material for: The formation of diamagnetic singly bonded (C70−)2 dimers in ionic complexes of fullerene C70 with tetrakis(dimethylaminoethylene)
Source: Royal Society of Chemistry journal article supplement (doi:10.1039/b927130a), 2010-01-01
Supplement: b927130a.pdf [file b927130a.pdf]

**Supplementary information.**

**Table 1.** IR spectra of starting and referring compounds and complexes **1** and **2**.

| Component                                     | C <sub>70</sub>                                                                                    | (TDAE <sup>•+</sup> )(C <sub>60</sub> <sup>•-</sup> )<br>[1]         | <b>1</b>                                                                                                                                                                                                                                                                                                                                                                        | <b>2</b>                                                                                                                                                                                                                                                                                                                                                                                     |
|-----------------------------------------------|----------------------------------------------------------------------------------------------------|----------------------------------------------------------------------|---------------------------------------------------------------------------------------------------------------------------------------------------------------------------------------------------------------------------------------------------------------------------------------------------------------------------------------------------------------------------------|----------------------------------------------------------------------------------------------------------------------------------------------------------------------------------------------------------------------------------------------------------------------------------------------------------------------------------------------------------------------------------------------|
| TDAE                                          |                                                                                                    | 872w<br>1060m<br>1143w<br>1355m<br>1396s<br>1517m                    | 874m<br>1060m<br>1145w<br>1355m<br>1392s*<br>1518m                                                                                                                                                                                                                                                                                                                              | 874m<br>1060m<br>1144w<br>1354m<br>1392s*<br>1508m-sp<br>1513m-sp<br>1518m-sp                                                                                                                                                                                                                                                                                                                |
| Fullerene                                     | C <sub>70</sub><br>457m<br>534s<br>564m<br>576s<br>642m<br>673m<br>794m<br>1132w<br>1413w<br>1429s | C <sub>60</sub> <sup>•-</sup><br>514w 526w<br>575s<br>1182w<br>1389s | (C <sub>70</sub> <sup>-</sup> ) <sub>2</sub> dimer<br>-<br>418w<br>475w<br>495w<br>508w<br>532s<br>535m<br>548m<br>557m<br>-<br>568w<br>570w<br>627w<br>658w*<br>668w<br>671w<br>-<br>712m<br>720m<br>801s<br>840w<br>902w<br>945w<br>1109w<br>1160w<br>1175m<br>1208w<br>-<br>1244w<br>1257w<br>1279m<br>1307w<br>1391s*<br>1411w<br>1428s<br>1442w<br>1481w<br>1541w<br>1563m | (C <sub>70</sub> <sup>-</sup> ) <sub>2</sub> dimer<br>401w<br>417w<br>473w<br>494w<br>508w<br>530s<br>535m<br>548m<br>556m<br>560w<br>565w<br>571w<br>627w<br>658w*<br>667w<br>670w<br>695w<br>713m<br>720m<br>800s<br>840w<br>901w<br>944w<br>1109w<br>1158w<br>1175m<br>1209w<br>1229w<br>1244w<br>1257w<br>1279m<br>1307w<br>1392s*<br>1411w<br>1428s<br>1440w<br>1480w<br>1541w<br>1562m |
| C <sub>6</sub> H <sub>4</sub> Cl <sub>2</sub> |                                                                                                    |                                                                      | 658w*<br>749s<br>1033m<br>-<br>1456w                                                                                                                                                                                                                                                                                                                                            | 658w*<br>750s<br>1033m<br>1125w<br>1455w                                                                                                                                                                                                                                                                                                                                                     |

sp- splitting; w-weak; m-middle; s-strong.  
a- the bands of two components coincide.

[1] K. Pokhodnia, J. Papavassiliou, P. Umek, A. Omerzu, D. Mihailovič, *J. Phys. Chem.*, 1999, **110**, 3606.
